# Supplementary material for: The role of oligodendrocyte precursor cells expressing the GPR17 receptor in brain remodeling after stroke
Source: PubMed Central journal article supplement (PMC5520912; doi:10.1038/cddis.2017.256), 2017-06-08
Supplement: cddis2017256x2.pdf [file cddis2017256x2.pdf]

*Ventral cortex*

|        | Pearson r | r <sup>2</sup> | p      | slope    | intercept |
|--------|-----------|----------------|--------|----------|-----------|
| CONTRA | 0.6454    | 0.4165         | 0.0028 | p=0.3847 | p<0.0001  |
| IPSI   | 0.0944    | 0.0089         | 0.7008 |          |           |

*Dorsal cortex*

|        | Pearson r | r <sup>2</sup> | p      | slope   | intercept |
|--------|-----------|----------------|--------|---------|-----------|
| CONTRA | 0.6658    | 0.4433         | 0.0019 | p=0.421 | p<0.0001  |
| IPSI   | 0.3382    | 0.1144         | 0.1567 |         |           |

*Corpus callosum*

|        | Pearson r | r <sup>2</sup> | p      | slope    | intercept |
|--------|-----------|----------------|--------|----------|-----------|
| CONTRA | 0.5611    | 0.3148         | 0.0124 | p=0.2927 | p<0.001   |
| IPSI   | 0.6255    | 0.3913         | 0.0042 |          |           |

*Striatum*

|        | Pearson r | r <sup>2</sup> | p      | slope     | intercept |
|--------|-----------|----------------|--------|-----------|-----------|
| CONTRA | 0.5040    | 0.2541         | 0.0278 | p=0.08484 | p<0.001   |
| IPSI   | 0.6919    | 0.4788         | 0.0010 |           |           |
